# Supplementary material for: Enhanced photoconductivity in CdS/betanin composite nanostructures
Source: Royal Society of Chemistry journal article supplement (doi:10.1039/c7ra13116j), 2018-01-01
Supplement: c7ra13116j1.pdf [file c7ra13116j1.pdf]

SUPPLEMENTARY Figure-S1

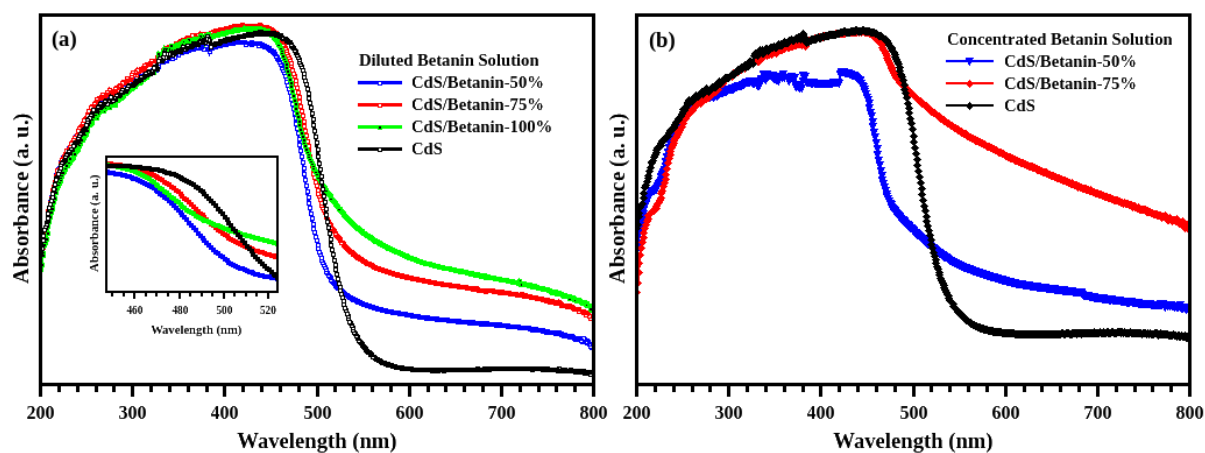

Fig S1: The absorbance of CdS and CdS/Betanin composite at different Betanin concentration. The additional band formation is observed only in samples prepared using concentrated Betanin solution. The optical properties of the composite are purely depending on the concentration of the Betanin solution. Less concentrated Betanin added samples has shift in absorption edge, but has no additional peak observed in the higher wavelength region.
